# Supplementary material for: Dataset on statistical reduction of highly water-soluble Cr (VI) into Cr (III) using RSM
Source: PubMed Central journal article supplement (PMC6377185; doi:10.1016/j.dib.2018.12.054), 2018-12-28
Supplement: mmc1.pdf [file mmc1.pdf]

## Conflict of Interest

*The authors have declared no conflict of interest*

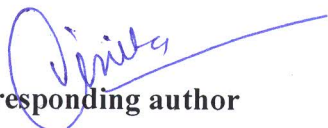

**Corresponding author**

Name: Dr. Vinita Khandegar (Assistant Professor)

Affiliation: University School of Chemical Technology

Guru Gobind Singh Indraprastha University, Dwarka New Delhi-110078, India
